# Supplementary material for: Climatological occurrences of hail and tornado associated with mesoscale convective systems in the United States
Source: Copernicus journal article supplement (doi:10.5194/nhess-2023-16), 2023-03-21
Supplement: Supplementary file 1 [file nhess-2023-16-supplement.pdf]

1  
2  
3  
4  
5  
6  
7  
8  
9  
10  
11  
12

**Supplementary Information**

**Climatological occurrences of hail and tornado associated with mesoscale convective systems in the United States**

Jingyu Wang<sup>1,2</sup>, Jiwen Fan<sup>1,\*</sup>, Zhe Feng<sup>1</sup>

<sup>1</sup> Pacific Northwest National Laboratory, Richland, Washington, USA

<sup>2</sup> National Institute of Education, Nanyang Technological University, Singapore

Corresponding author:

Jiwen Fan, [jiwen.fan@pnnl.gov](mailto:jiwen.fan@pnnl.gov); Jingyu Wang, [jingyu.wang@nie.edu.sg](mailto:jingyu.wang@nie.edu.sg)

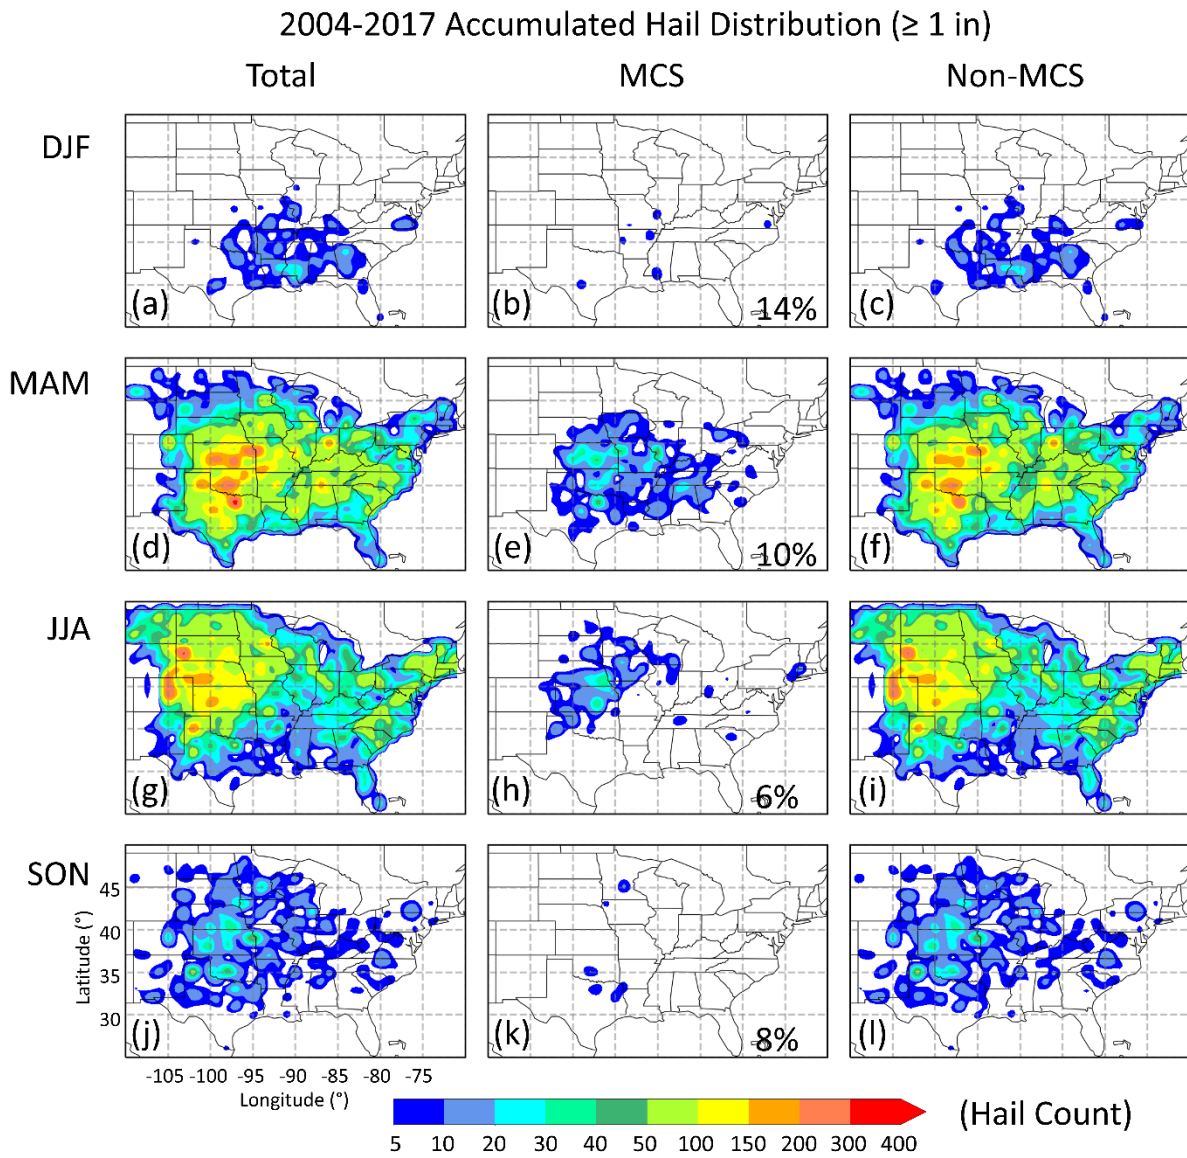

13

14 **Figure S1.** Same as Figure 3 but using 8 km convective aggregation radius.

2004-2017 Accumulated Tornado Distribution ( $\geq$  EF0)

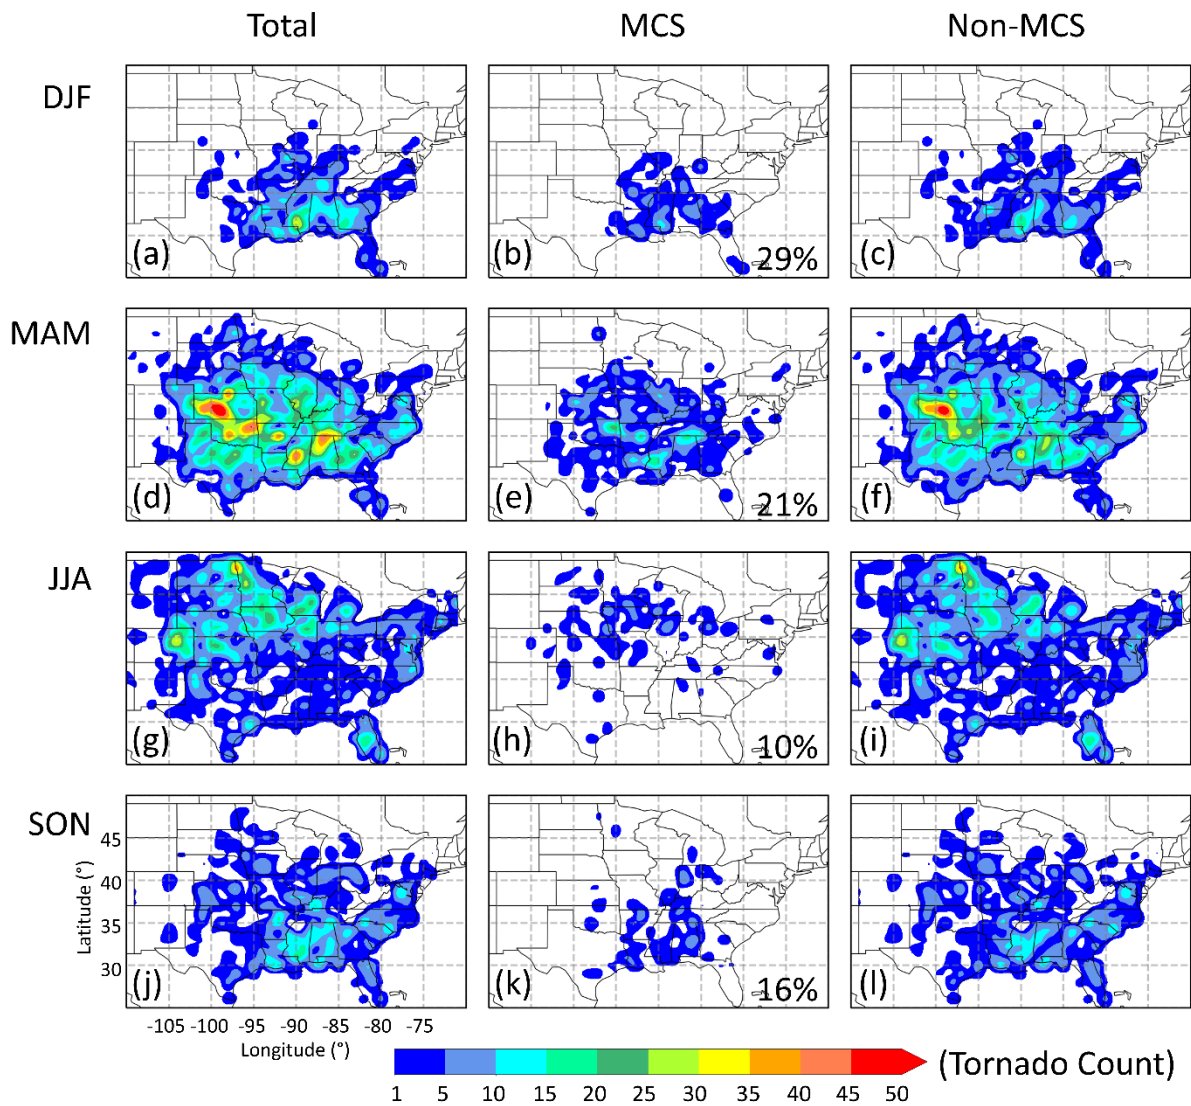

15

16 **Figure S2.** Same as Figure 4 but using 8 km convective aggregation radius.

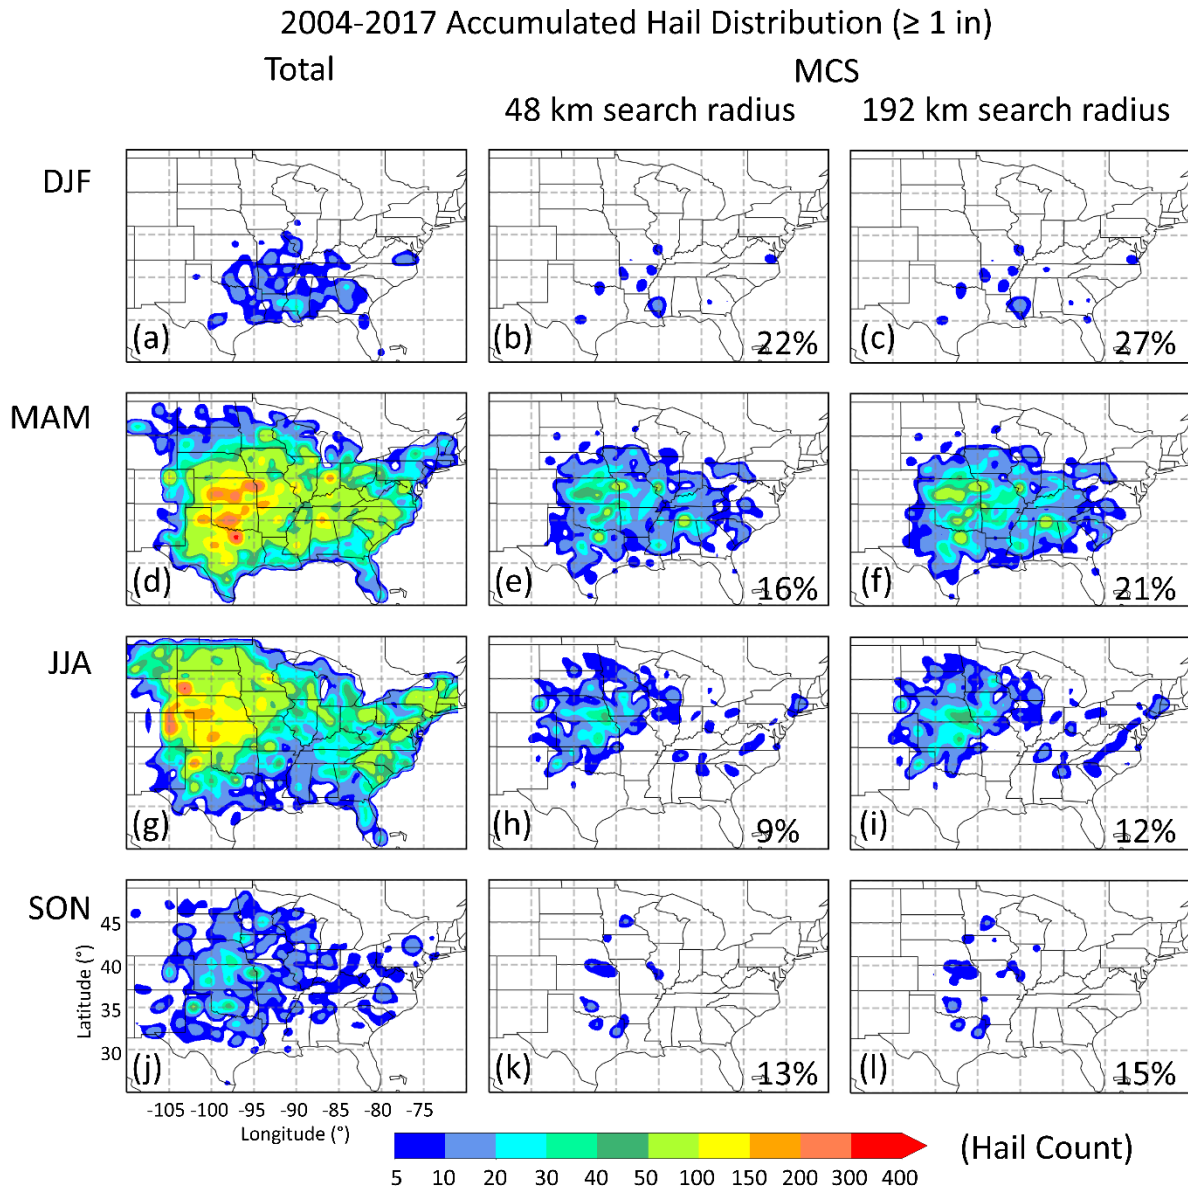

17

18 **Figure S3.** Same as Figure 3 but using varying stratiform search radius.

2004-2017 Accumulated Tornado Distribution ( $\geq$  EF0)

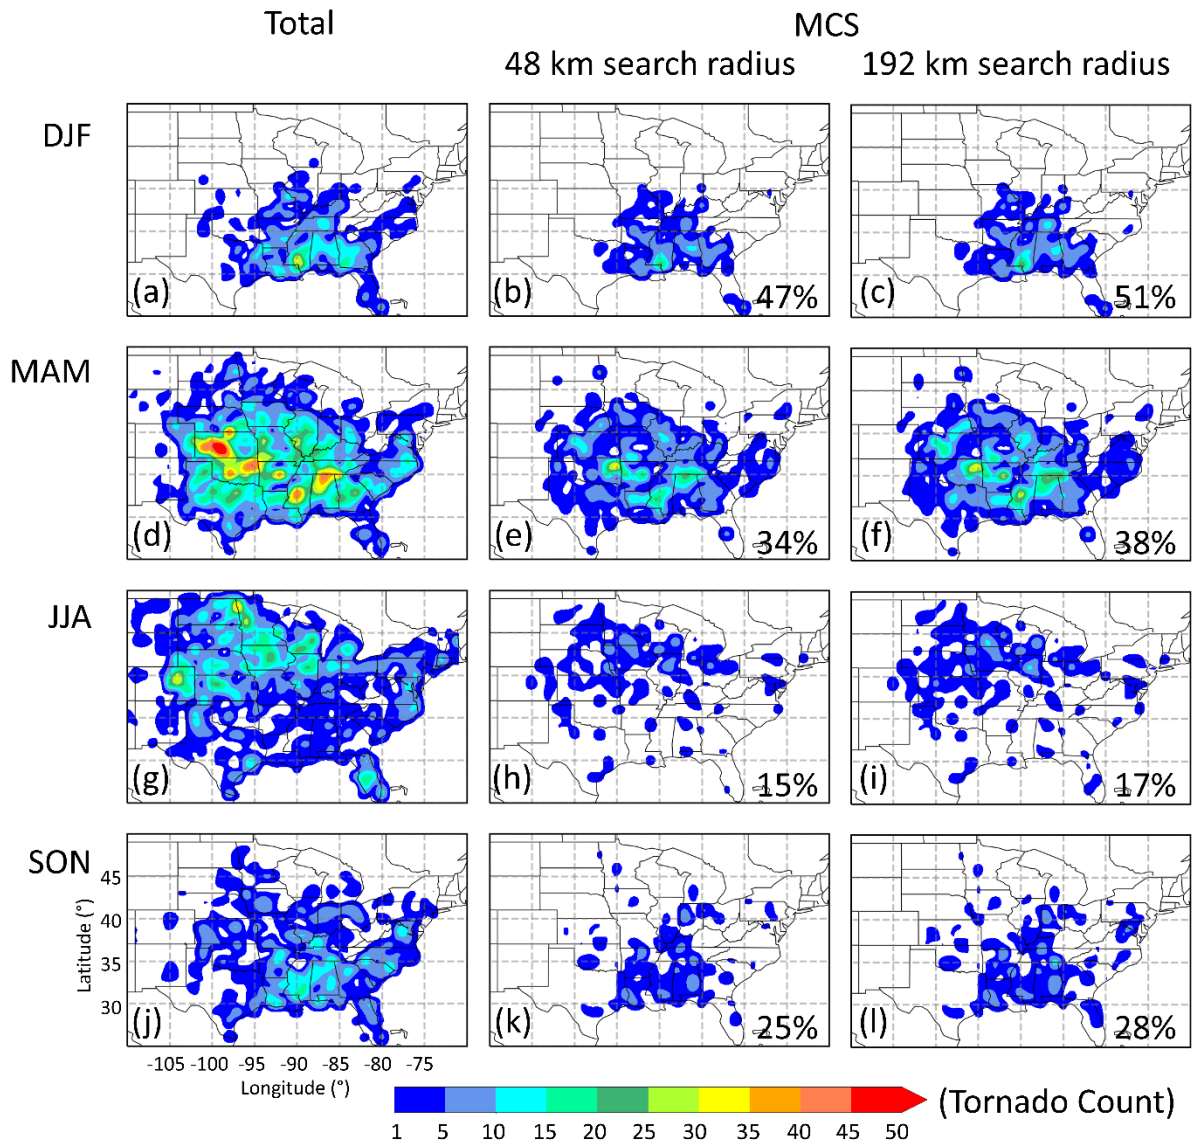

19

20 **Figure S4.** Same as Figure 4 but using varying stratiform search radius.

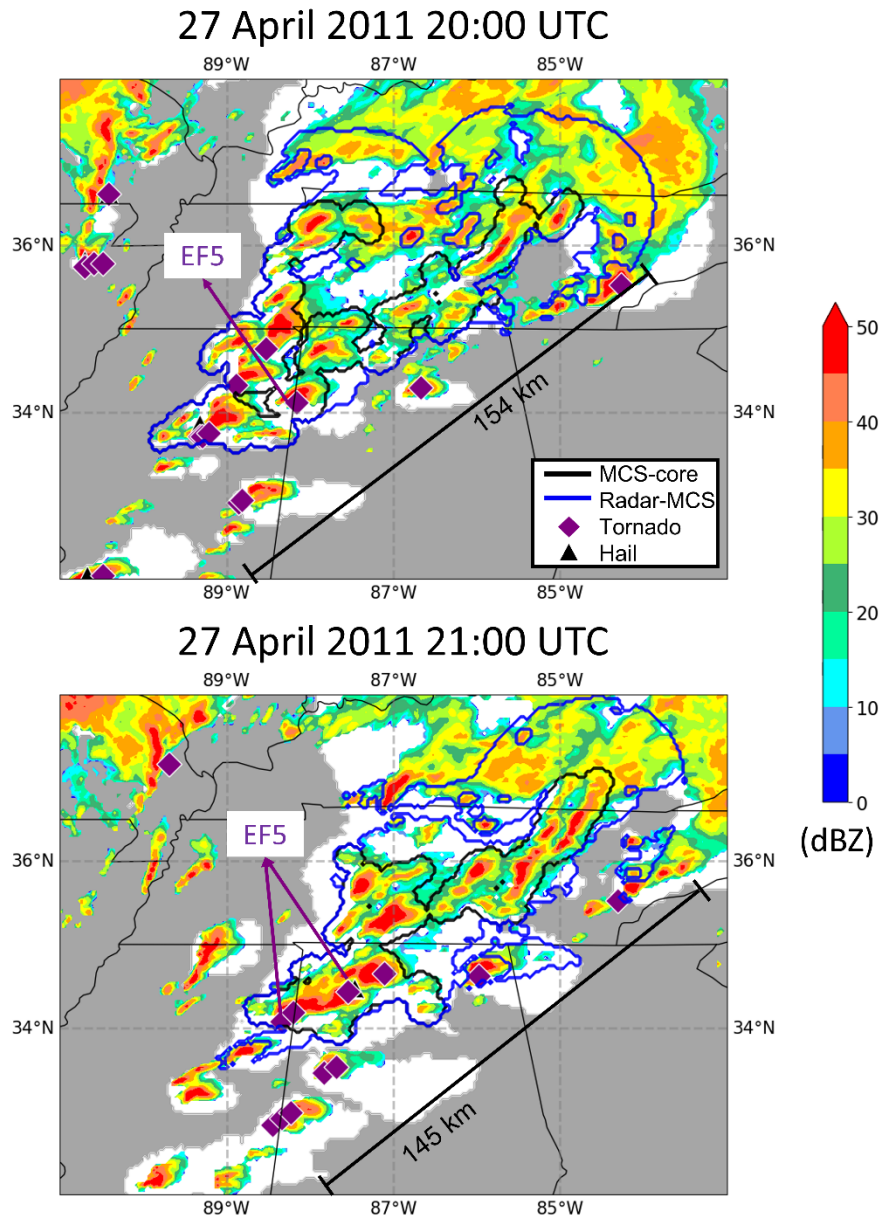

21

22 **Figure S5.** Same as Figure 2 but for (a) 20:00 UTC, 27 April 2011 and (b) 21:00 UTC, 27 April

23 2011.

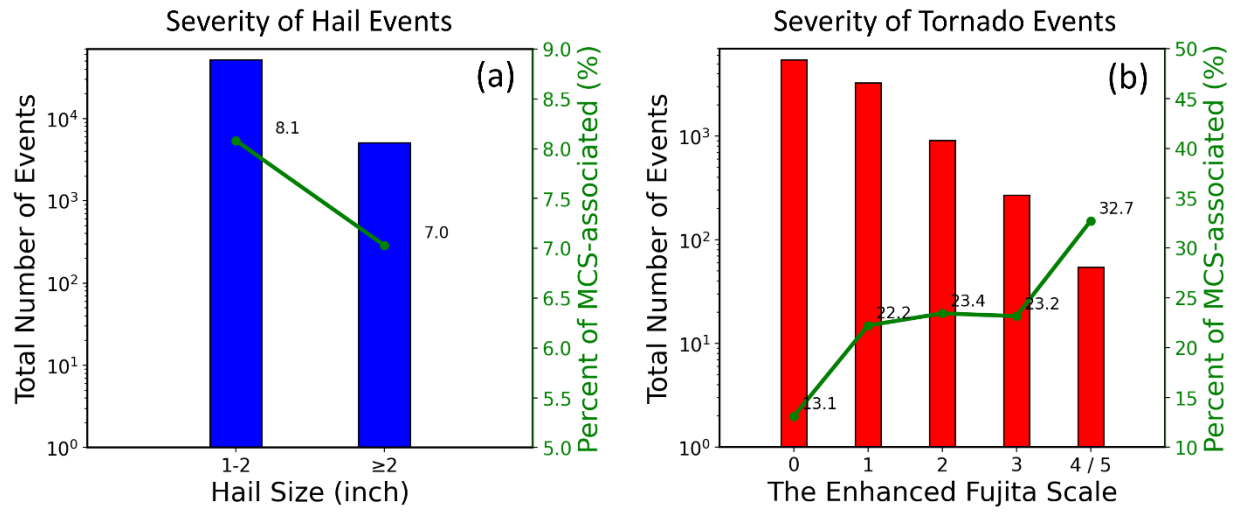

24

25 **Figure S6.** Same as Figure 7 but convective aggregation radius of 8 km.

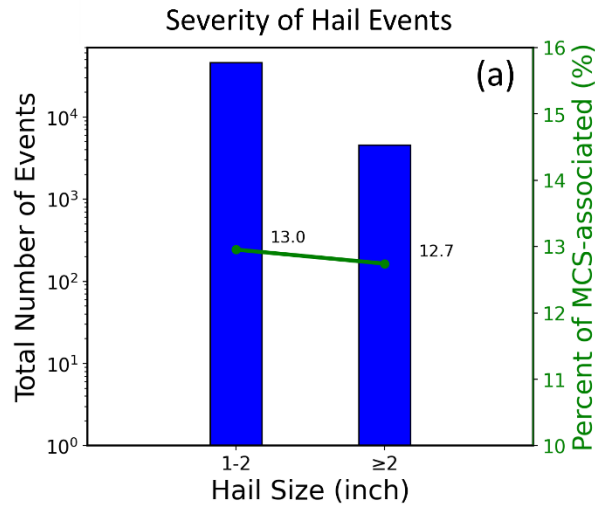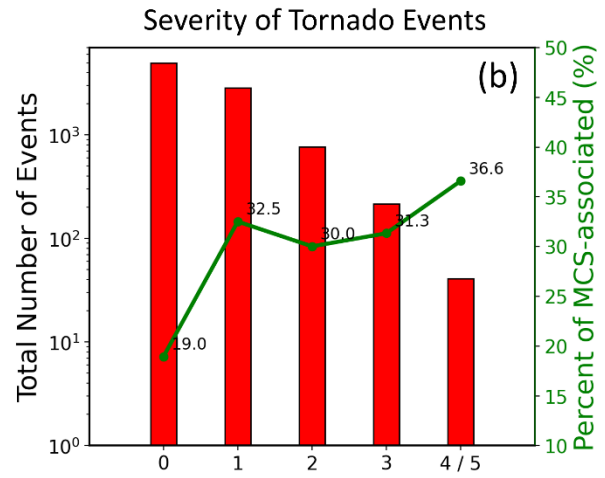

26

27 **Figure S7.** Same as Figure 7 but excluding the year of 2011.

28
